1                   **Continued Evaluation of Environmental Stimuli in the Absence of Consciousness**  
2                   **suggests the Human Brain is Standing Sentinel during Sleep**

3  
4                   Christine Blume<sup>1,2</sup>, Renata del Giudice<sup>1,2</sup>, Malgorzata Wislowska<sup>1,2</sup>,  
5                   Dominik P. J. Heib<sup>1,2</sup>, Manuel Schabus<sup>1,2</sup>

6  
7                   <sup>1</sup> University of Salzburg, Department of Psychology, Laboratory for Sleep, Cognition and  
8                   Consciousness Research

9                   <sup>2</sup> University of Salzburg, Centre for Cognitive Neuroscience Salzburg (CCNS)

10  
11                   **Corresponding Author:**

12                   Univ.-Prof. Dr. Manuel Schabus  
13                   University of Salzburg  
14                   Centre for Cognitive Neuroscience (CCNS)  
15                   Laboratory for “Sleep, Cognition and Consciousness Research”  
16                   Hellbrunner Str. 34  
17                   A-5020 Salzburg  
18                   Email: [manuel.schabus@sbg.ac.at](mailto:manuel.schabus@sbg.ac.at)

19  
20                   *Authors' email addresses:*

21                   [christine.blume@sbg.ac.at](mailto:christine.blume@sbg.ac.at)  
22                   [renata.delgiudice@sbg.ac.at](mailto:renata.delgiudice@sbg.ac.at)  
23                   [malgorzata.wislowska@sbg.ac.at](mailto:malgorzata.wislowska@sbg.ac.at)  
24                   [dominik.heib@sbg.ac.at](mailto:dominik.heib@sbg.ac.at)

25  
26                   **Funding**

27                   CB is supported by the Konrad-Adenauer-Stiftung e.V. and CB, MW and DPJH are supported by a grant  
28                   from the Austrian Science Fund FWF (Y-777). CB, RdG, MW and DPJH are also supported by the  
29                   Doctoral College “Imaging the Mind” (FWF; W1233-G17).

31 **Abstract**

32 While it is well-known that subject's own names (SON) or familiar voices are salient during  
33 wakefulness, we investigate stimulus processing during sleep including N3 and REM sleep. Additionally,  
34 we investigate how sleep EEG patterns (i.e. sleep spindles and slow oscillations [SOs]) relate to stimulus  
35 processing. Using 256-channel EEG we studied stimulus processing by means of event-related oscillatory  
36 responses (de-/synchronisation, ERD/ERS) and potentials (ERPs). We varied stimulus salience by  
37 manipulating subjective (SON vs. unfamiliar name) and paralinguistic emotional relevance (familiar vs.  
38 unfamiliar voice, FV/UFV). We show that evaluation of voice familiarity continues during all NREM  
39 sleep stages and even REM sleep suggesting a 'sentinel processing mode' in the absence of  
40 consciousness. Especially UFV stimuli elicit larger responses in a 1-15Hz range suggesting they are  
41 salient. Unlike previously suggested sleep spindles and the negative slope of SOs do not uniformly inhibit  
42 information processing but inhibition seems to be tuned to stimulus salience.

43

44

45 *Keywords:* sleep, sleep spindles, slow oscillations, high-density electroencephalography, auditory  
46 stimulation

## 47 **Introduction**

48 Cognitive processing and task performance are well-known to vary with time of day (Dijk, Duffy, &  
49 Czeisler, 1992; Santhi et al., 2016; Wyatt, Cecco, Czeisler, & Dijk, 1999). Behaviourally, it can readily be  
50 observed with major variations in performance paralleling the sleep-wake cycle. Beyond these within-  
51 state studies that investigated wakefulness only, we lately studied cognitive processing during the fading  
52 of consciousness, which we here define as behavioural responsiveness, that is across vigilance stages  
53 from waking to light NREM sleep (Blume et al., 2016). Specifically, we compared processing of  
54 subjectively relevant vs. irrelevant stimuli (i.e. subject's own names [SONs] vs. unfamiliar names [UNs])  
55 during wakefulness and non-rapid eye movement (NREM) sleep stages N1 and N2 during a nap and  
56 additionally varied the emotional prosody of the stimuli (i.e. stimuli spoken by an angry vs. a neutral  
57 voice [AV vs. NV]). Interestingly, we found evidence for preferential processing of salient stimuli (i.e.  
58 SONs and AV stimuli) not only during wakefulness, but also during light NREM sleep with these  
59 findings suggesting not only continued processing of external stimuli, but a 'sentinel processing mode' of  
60 the brain during states of decreased consciousness and naturally occurring unconsciousness, that is N1  
61 and N2 sleep, respectively. Moreover, this initial preferential processing of salient stimuli seemed to be  
62 accompanied by a subsequent inhibitory sleep-protecting process during N2 sleep that was reflected by a  
63 K-complex-like response.

64 In the present study we sought to replicate our previous findings on the interaction between 'global  
65 brain' or vigilance states (i.e. wakefulness, N1 and N2 sleep) and stimulus characteristics and expand  
66 them to deep N3 as well as rapid-eye-movement (REM) sleep during a full night. Beyond this, we aimed  
67 at investigating the interaction between stimulus characteristics and 'local brain states' in more fine-  
68 grained analyses. In particular, we were interested in the interaction between stimuli and sleep-specific  
69 electroencephalogram (EEG) phenomena, that is sleep spindles and slow oscillations. Sleep spindles are  
70 considered the hallmark of N2 sleep albeit they also occur during sleep stage N3. They are defined as  
71 bursts of oscillatory activity in the sigma range (11-15Hz) with a characteristic waxing and waning shape

72 and a duration of 0.5-3s. Slow oscillations (SOs), on the other hand, are defined as large delta (0.5-3Hz)  
73 waves with a first negative going wave that is followed by a positive going deflection. They occasionally  
74 occur during N2 sleep already, where they may appear as isolated K-complexes, but their probability of  
75 occurrence strongly increases with sleep depth also being a criterion for the definition of deep N3 sleep.

76 While it is well-established that the brain is not completely shut off from the environment during  
77 sleep but continues to process external stimuli (e.g. Bastuji & García-Larrea, 1999; Blume et al., 2016;  
78 Perrin, Garcia-Larrea, Mauguiere, & Bastuji, 1999; Strauss et al., 2015), studies also suggest that sleep-  
79 specific oscillatory patterns, that is sleep spindles as well as SOs, can significantly alter stimulus  
80 processing. Generally, it has been suggested that during spindles the thalamus acts as a sensory filter  
81 inhibiting sensory transmission to the forebrain (Steriade, 1991). The negative or positive going slope of  
82 SOs on the other hand has been associated with changes in the probability of synaptic release at the  
83 cortical level, which could affect stimulus processing (Massimini & Amzica, 2001). In a combined EEG  
84 and functional magnetic resonance imaging (fMRI) study Schabus et al. (2012) found that responses to  
85 simple tones during NREM sleep were comparable to responses during wakefulness except for when  
86 tones were presented during a spindle or the negative going slope of a slow oscillation thereby also  
87 confirming previous findings (Dang-Vu et al., 2011; see De Gennaro & Ferrara, 2003 for an overview;  
88 Massimini, Rosanova, & Mariotti, 2003). Likewise, in a study that looked at event-related potentials  
89 (ERPs) Elton et al. (1997) suggested that sleep spindles inhibit processing of auditory stimuli and Cote,  
90 Epps, and Campbell (2000) additionally found the effect of sleep spindles on processing to be modulated  
91 by stimulus intensity. Specifically, they report that spindles co-occurring with more intense (i.e. louder)  
92 stimuli seemed to inhibit processing to a greater extent than it was the case with less intense stimuli.  
93 Regarding slow oscillatory activity on the other hand, a pioneering study by Oswald, Taylor, and  
94 Treisman (1960) already showed that SONs evoke more K-complexes (KCs) than do unfamiliar names.  
95 Beyond this, Massimini et al. (2003) showed that evoked somatosensory EEG potentials were strongly  
96 modified not only by the presence but also by the phase of the slow oscillation. In summary, these

97 findings strongly suggest that sleep spindles and slow oscillatory activity systematically alter stimulus  
98 processing during NREM sleep in a dynamic manner.

99       The aim of the present study was to investigate processing of more complex auditory stimuli (as  
100 compared to simple tones) in relation to (i) ‘global’ as well as (ii) ‘local’ states of the brain. Complex  
101 stimuli were first names that varied in salience on two dimensions, namely subjective relevance (SONs  
102 vs. UNs) and familiarity or paralinguistic aspects of emotional relevance. Specifically, stimuli were  
103 uttered by a familiar voice (FV) vs. a stranger’s voice (unfamiliar voice [UFV]). Regarding the first aim,  
104 we studied stimulus processing during all ‘global brain states’ across the vigilance continuum (i.e. during  
105 wakefulness, N1, N2, N3 and REM sleep) irrespective of the ‘local state’. Regarding ‘local’ states, we  
106 investigated between-stimulus differences in oscillatory activity when (i) a spindle was present during  
107 stimulus presentation, when a stimulus was presented during the (ii) positive slope of a SO, (iii) during  
108 the negative slope and when (iv) stimulus presentation evoked a SO. Processing was studied by  
109 comparing oscillatory brain responses evoked by stimulus presentation in each of these cases, that is  
110 event-related synchronisation (ERS) and desynchronisation (ERD) in the delta (1-3Hz), theta (4-7Hz),  
111 alpha (8-12Hz) and sigma (11-15 Hz) frequency range. Functionally, delta ERS has repeatedly been  
112 linked to attentional processes and the detection of salient or motivationally relevant stimuli (for reviews  
113 see Knyazev, 2007; Knyazev, 2012) while theta ERS has been suggested to indicate the encoding of new  
114 information as well as working and episodic memory involvement (for a review see Klimesch, 1999;  
115 Klimesch, Schack, & Sauseng, 2005). Alpha ERD on the other hand is thought to reflect task demands,  
116 attentional processes and memory retrieval processes (for a review see Klimesch, 1999; Klimesch,  
117 Doppelmayr, Russegger, Pachinger, & Schwaiger, 1998). Importantly, all these interpretations have been  
118 established during wakefulness and it is likely that their functional roles are different during sleep. In a  
119 previous publication, we suggested that delta and theta ERS during sleep may mirror an inhibitory sleep-  
120 protecting response following initial processing of salient stimuli as has been suggested for sigma ERS  
121 (Blume et al., 2016).

122 We hypothesised that oscillatory responses would mirror salience of SONs as well as FV stimuli  
123 (compared to UNs and UFV) during wakefulness. Moreover, we expected responsiveness to stimuli to  
124 vary with the ‘global brain state’, that is a decrease in responsiveness from wakefulness to N3 sleep.  
125 Regarding the ‘local brain state’ we expected that when stimulus-presentation co-occurs with sleep  
126 spindles and slow oscillations the differential brain response elicited by stimulus salience would vanish.  
127 This should specifically be the case when stimulus onset coincided with the negative slope of the slow  
128 oscillation or stimulus presentation largely overlapped with a sleep spindle.

129

## 130 Results

### 131 Wakefulness

132 Analyses in the delta band (1-3Hz) yielded a significant effect of *name* (see Fig. 1A).  
133 Specifically, analyses revealed that SONs led to stronger ERS at 2Hz in a frontocentral and a parieto-  
134 occipital cluster ( $p = .01$  and  $p = .02$ , respectively) with an effect size of  $d = 1.11$ . This effect was also  
135 visible in the ERP with SONs giving rise to a stronger P3 component than UNs ( $d = .5$ , see Fig 1B).  
136 Analyses did not indicate a significant effect of *voice* or a *name*  $\times$  *voice* interaction (*voice*:  $ps > 0.37$ ;  
137 *name*  $\times$  *voice*:  $ps > .35$ ).

## NAME WAKEFULNESS

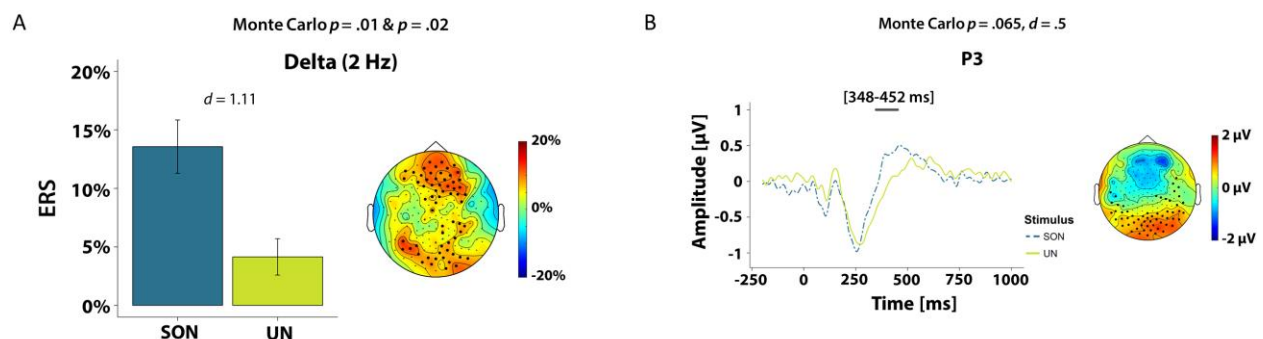

139 **Fig. 1: Event-Related Responses during Wakefulness.** (A) Responses in the delta (1-3Hz) range. Bar plot  
140 for the effect of *name* (left) and corresponding scalp plot of differences in ERS between SONs and UNs (right).

141 Large black dots indicate the electrodes that are part of the significant clusters at 2Hz. Error bars indicate  $\pm 1$   
142 standard error of the mean. Please note that for illustration purposes we show the effects at a representative  
143 frequency (i.e. 2 Hz) although significant clusters may have comprised a larger frequency range (see main text). **(B)**  
144 Event-related P3 response. Left: Grand average of the ERP elicited by SONs and UNs during wakefulness at all  
145 electrodes that were part of the cluster (see scalp plot). The horizontal grey line represents the time window during  
146 which the effect was significant (348 to 452ms). Right: Scalp plot of the difference in the ERPs evoked by SONs  
147 and UNs. Large black dots indicate electrodes that were part of the marginally significant cluster and  $d$  is Cohen's  $d$   
148 for the significant clusters. SON = subject's own name, UN = unfamiliar name. Analyses and figures are based on data  
149 from  $n = 17$  participants.

150

151 In the theta, alpha and sigma bands (4-15Hz), the analyses yielded no significant effects (*voice: ps*  
152  $> 0.62$ ; *name: ps*  $> 0.24$ ; *name  $\times$  voice: ps*  $> 0.4$ ).

153

#### 154 *Sleep*

155 Analysis of the sleep staging results revealed that the median of the total sleep time (TST) during  
156 the experimental night was 430.5 minutes (range 300-481.5 min). Wakefulness after sleep onset (WASO)  
157 had a median of 20 minutes (range 3.5-110 min). The total number of awakenings varied between 5 and  
158 25 with a median of 15. SOL to N2 was characterised by a median of 20 minutes (range 10-107.5 min),  
159 and SOL to REM had a median of 92.5 minutes (range 68.5-228 min). Regarding sleep architecture  
160 participants had a median of 7.2% N1 sleep (range 2.7-13.7%), a median of 37% N2 sleep (range 23-  
161 54.4%), a median of 34.2% N3 sleep (range 16.5-46.1%) and a median of 18.9% REM sleep (range 12.2-  
162 45.1%).

163

#### 164 “Global Brain State” Analyses

##### 165 *N1 sleep*

166           During light N1 sleep, analyses yielded significant stimulus-induced differences in delta (1-3Hz)  
167   ERS for the effect of *voice* ( $p < .001$ ). Here, UFV stimuli elicited stronger delta ERS than FV stimuli in a  
168   cluster that spanned large areas of the scalp with a frontal-central focus (see Fig. 2A). There were no  
169   further significant stimulus-induced differences in the delta range (*name*:  $p > .21$ ; *name*  $\times$  *voice*: no  
170   significant clusters). Analyses of responses in the theta, alpha and sigma bands (4-15Hz) also yielded a  
171   significant effect of *voice* ( $p = .003$ , see Fig. 2C). Here, UFV stimuli elicited considerable ERS in the  
172   theta through sigma frequency range in all time windows analysed (T1-T6: 4-15Hz). Analyses did not  
173   show a significant effect of *name* ( $ps > .26$ ), but a marginally significant *name*  $\times$  *voice* interaction ( $p =$   
174   .055) with UFV stimuli eliciting stronger ERS irrespective of the name that was presented, i.e. SON or  
175   UN thus confirming the main effect of *voice*. The effects of *voice* were also confirmed by ERP analyses  
176   with a stronger positive (92-428ms) and negative component (440-996ms) for UFV as compared to FV  
177   (see Suppl. Fig. 2A).



# FAMILIARITY OF VOICE

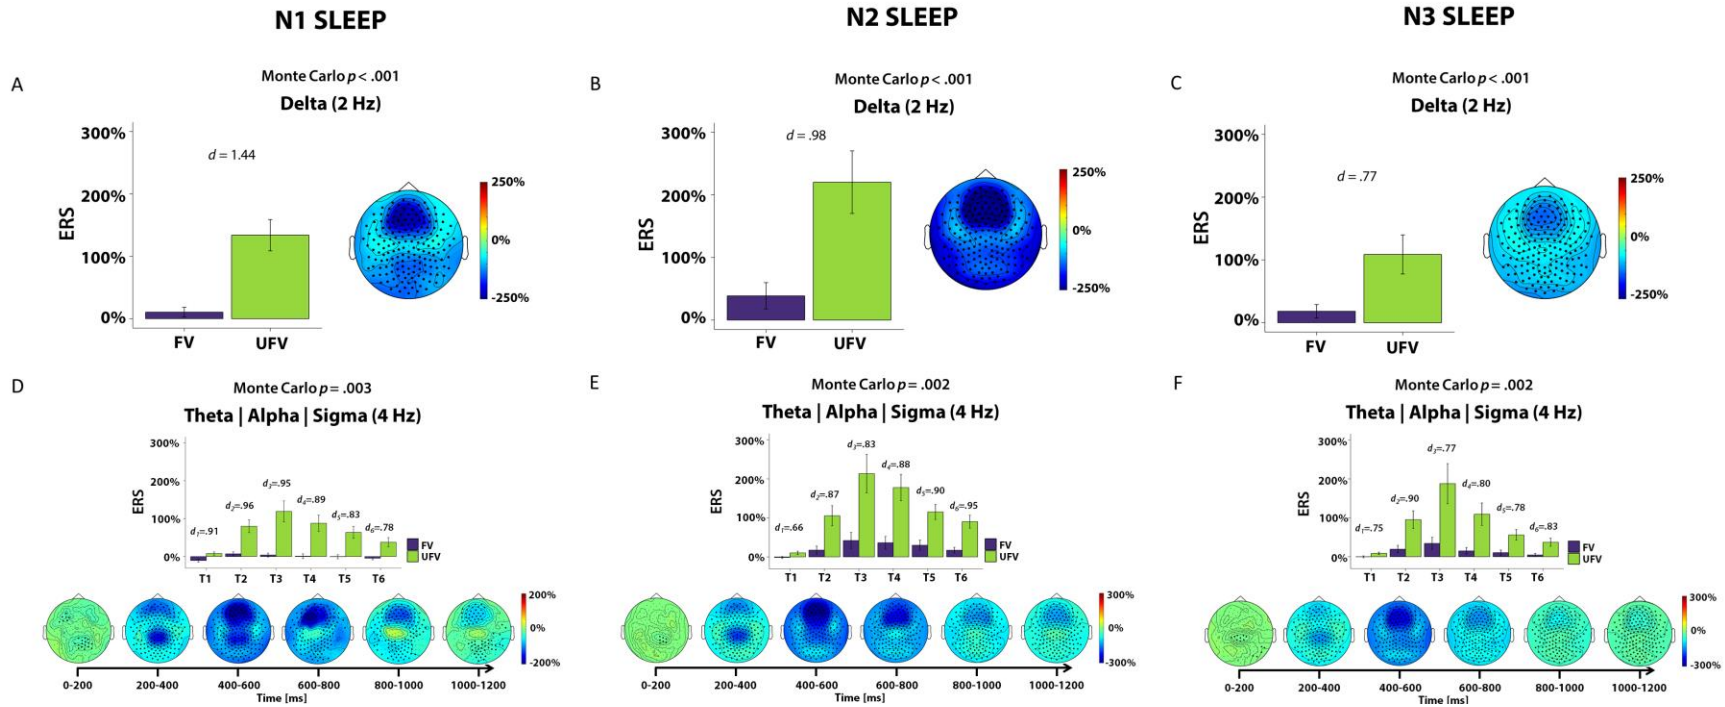

178

179

180

181

182

183

**Fig. 2: Event-related responses during NREM sleep.** (A, B, C): Event-related responses in the delta range (1-3 Hz) during N1, N2 and N3. Bar plots for the effect of *voice* (left) and corresponding scalp plots of differences in ERS between FV and UFV (right). (D, E, F) Event-related responses in the theta/alpha/sigma range (4-15Hz) during N1, N2 and N3. Bar plot for the effect of *voice* during the six time windows (top) and corresponding scalp plots of differences in ERS/ERD between FV and UFV stimuli (bottom). Large black dots indicate the electrodes that are part of the significant clusters and  $d$  is Cohen's  $d$  for the significant clusters. Error bars indicate  $\pm 1$  standard error of the mean. Please note that for illustration purposes we show the effects at representative

184 frequencies (i.e. 2 and 4 Hz) although significant clusters may have comprised a larger frequency range (see main text). FV = familiar voice, UFV = unfamiliar  
185 voice. Analyses and figures are based on data from  $n = 17$  participants.

186 *N2 sleep*

187 Analyses in the delta range yielded a significant effect of *voice* ( $p < .001$ ) with a cluster covering  
188 the whole scalp. Specifically, UFV stimuli elicited stronger delta ERS than FV stimuli for all frequencies  
189 between 1 and 3Hz. The (fronto-central) topography was comparable to the N1 effect of *voice* in the delta  
190 range (see Fig. 2A and 2B). Analyses did not yield an effect of *name* or a *name*  $\times$  *voice* interaction ( $ps >$   
191  $.18$  and *no clusters*, respectively). In the theta to sigma range (4-15Hz), analyses also revealed a  
192 significant effect of *voice* ( $p = .002$ ). Here, again UFV stimuli elicited strong ERS between 4 and 15Hz  
193 following about 200ms while FV stimuli elicited much less ERS (T1: 4-7 & 15Hz; T2-T6: 4-15Hz). The  
194 topography and time course was comparable to the N1 effect (see Fig. 2D and Suppl. Fig. 1D). Besides  
195 this, analyses showed no effect of *name* ( $ps > .16$ ) and no *name*  $\times$  *voice* interaction ( $ps > .34$ ). The effects  
196 of *voice* in oscillatory analyses were also confirmed by ERP analyses (see Suppl. Fig. 2B).

197

198 *N3 sleep*

199 During N3 sleep, analyses in the delta range (1-3Hz) revealed a significant effect of *voice* ( $p <$   
200  $.001$ ). UFV stimuli gave rise to stronger delta ERS than did FV stimuli in a cluster covering large areas of  
201 the scalp. Again, the topography was comparable to the results obtained in N1 and N2 (see. Fig. 2A, Fig.  
202 2B and Fig. 2C). Analyses did not reveal any stimulus-induced differences for the *name* effect (no  
203 clusters) or the *name*  $\times$  *voice* interaction (no clusters) in the delta range. Analyses in the theta to sigma  
204 range (4-15Hz) revealed a significant effect of *voice* ( $p = .002$ ; T1: 4-9 & 15Hz; T2-6: 14-15Hz). Here,  
205 UFV stimuli elicited stronger ERS than did UFV stimuli, an effect that was especially pronounced  
206 between about 200 and 1200ms following stimulus onset in a cluster that spanned more or less the whole  
207 scalp. Also here, the time course and topography was comparable to the results obtained during N1 and  
208 N2 (cf. Fig. 2D, Fig. 2E and Fig. 2F). Analyses did not yield any other significant effects (*name*:  $ps > .23$ ;  
209 *name*  $\times$  *voice*:  $ps > .31$ ). Analyses of ERPs confirmed the effects of *voice* (see Suppl. Fig. 2C).

210

211 REM sleep

212 Analyses during REM sleep yielded a significant effect of *voice* in the delta range (1-3Hz,  $p =$   
213  $.018$ , see Fig. 3A). As during N1-N3 FV stimuli were associated with stronger delta ERS between 1 and  
214 2Hz than were UFV. There were no further stimulus-induced differences in delta ERS/ERD (*name*:  $ps >$   
215  $.18$ ; *name*  $\times$  *voice* interaction:  $ps > .17$ ). Analyses in the theta to sigma range (4-15Hz) yielded a  
216 significant *voice* effect ( $p = .006$ , see Fig. 3B). Here, UFV stimuli elicited stronger ERS than FV stimuli  
217 following about 200ms. The effect mainly covered the alpha through sigma range (T1: 5Hz; T2: 4-15Hz;  
218 T3: 5-6 & 12-15Hz; T4/5: 8-15Hz; T6: 9-15Hz) and was most pronounced at central and centroparietal  
219 electrodes. Generally, effects during REM were much less pronounced and delayed compared to the  
220 NREM sleep stages. Analyses did not yield any further significant effects (*name*:  $ps > .37$ ; *name*  $\times$  *voice*:  
221  $ps > .32$ ).

## FAMILIARITY OF VOICE REM SLEEP

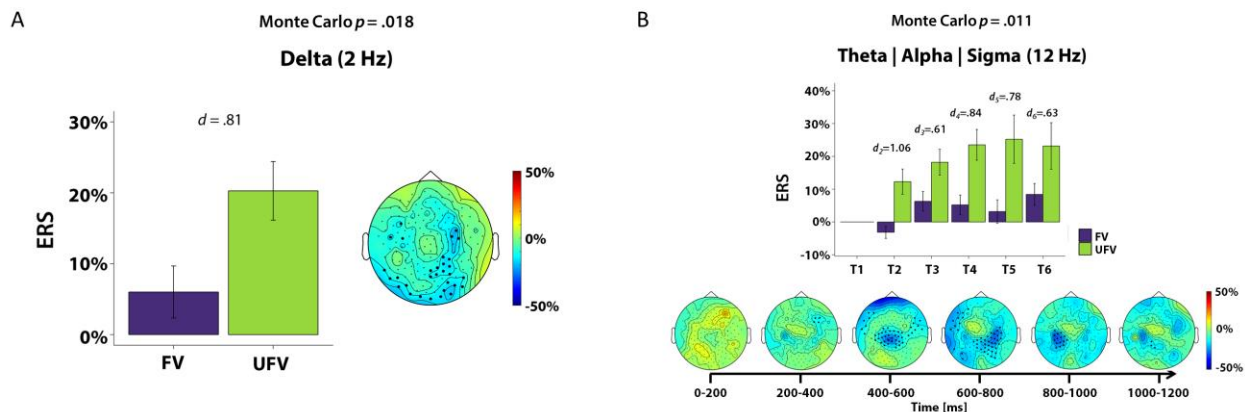

222

223 **Fig. 3: Event-related responses during REM sleep.** (A) Event-related responses in the delta (1-3Hz)  
224 range. Bar plot for the effect of *voice* (left) and corresponding scalp plot of differences in ERS between FV and UFV  
225 (right). Large black dots indicate the electrodes that are part of the significant cluster at 2Hz. (B) Event-related  
226 responses in the theta/alpha/sigma (4-15Hz) range. Bar plot for the effect of *voice* during the six time windows (top)  
227 and corresponding scalp plots of differences in ERS/ERD between FV and UFV stimuli (bottom). Large black dots  
228 indicate the electrodes that are part of the cluster at 12Hz and  $d$  is Cohen's  $d$  for the significant clusters. Error bars

229 indicate  $\pm 1$  standard error of the mean. Please note that for illustration purposes we show the effects at  
230 representative frequencies (i.e. 2 and 12 Hz) although significant clusters may have comprised a larger frequency  
231 range (see main text). FV = familiar voice, UFV = unfamiliar voice. Analyses and figures are based on data from  $n =$   
232 17 participants.

233

#### 234 “Local Brain State”- Analyses

##### 235 *Sleep Spindle vs. No Spindle*

236 In both conditions, analyses of ERD/ERS revealed significant effects of *voice* in the delta range  
237 (“spindle” condition [S+];  $p = .03$ ; 1-2Hz, see Fig. 4A and “no spindle” condition [S-]:  $p = .028$ ; 1-3Hz,  
238 cf. Fig. 4B) with UFV stimuli eliciting stronger delta ERS than FV stimuli. Besides, post hoc analyses  
239 indicated that stimulus presentation elicited more ERS in the S- compared to the S+ condition ( $p = .073$ ).  
240 There were no further effects in the delta range in either condition (S+: *name*:  $p = .40$ ; *name*  $\times$  *voice*: no  
241 clusters; S-: *name*: no clusters; *name*  $\times$  *voice*:  $ps > .26$ ). In the theta to sigma range (4-15Hz) there were  
242 also significant effects of *voice* in both the “spindle” and the “no spindle” conditions (S+:  $p = .033$ , T1:  
243 15Hz; T2: 4 & 8-15Hz; T3/4: 4-15Hz; T5: 8-15Hz, T6: 6-15Hz, see Figs. 4C and E; S-:  $p = .016$ , T1: not  
244 part of the cluster; T2: 4-12 Hz; T3: 4-14Hz; T4/5: 4-15Hz; T6: 4-9Hz, see Figs. 4D and F). Interestingly,  
245 the topography and time course of the effects in the “no spindle” condition were only comparable to the  
246 results in the “spindle” condition in the slower frequencies up to about 9Hz. While in the slower  
247 frequencies UFV stimuli elicited stronger ERS than FV stimuli, in the faster frequencies (10-15Hz), FV  
248 stimuli were specifically associated with a marked ERD in the “spindle” condition only (Condition  
249 differences:  $p < .001$ , diamonds in Figs. 4E and F indicate time windows with sign. differences). Analyses  
250 did not yield any further significant differences in the theta to sigma range (S+: *name*:  $ps > .12$  and *name*  
251  $\times$  *voice*:  $ps > .10$ ; S-: *name*:  $ps > .22$ ; *name*  $\times$  *voice*:  $ps > .24$ ). ERP analyses showed a significant effect of  
252 *voice* that corresponded to the effects in the oscillatory analyses only in the “spindle” condition (see  
253 Suppl. Fig. 3).

254

## FAMILIARITY OF VOICE

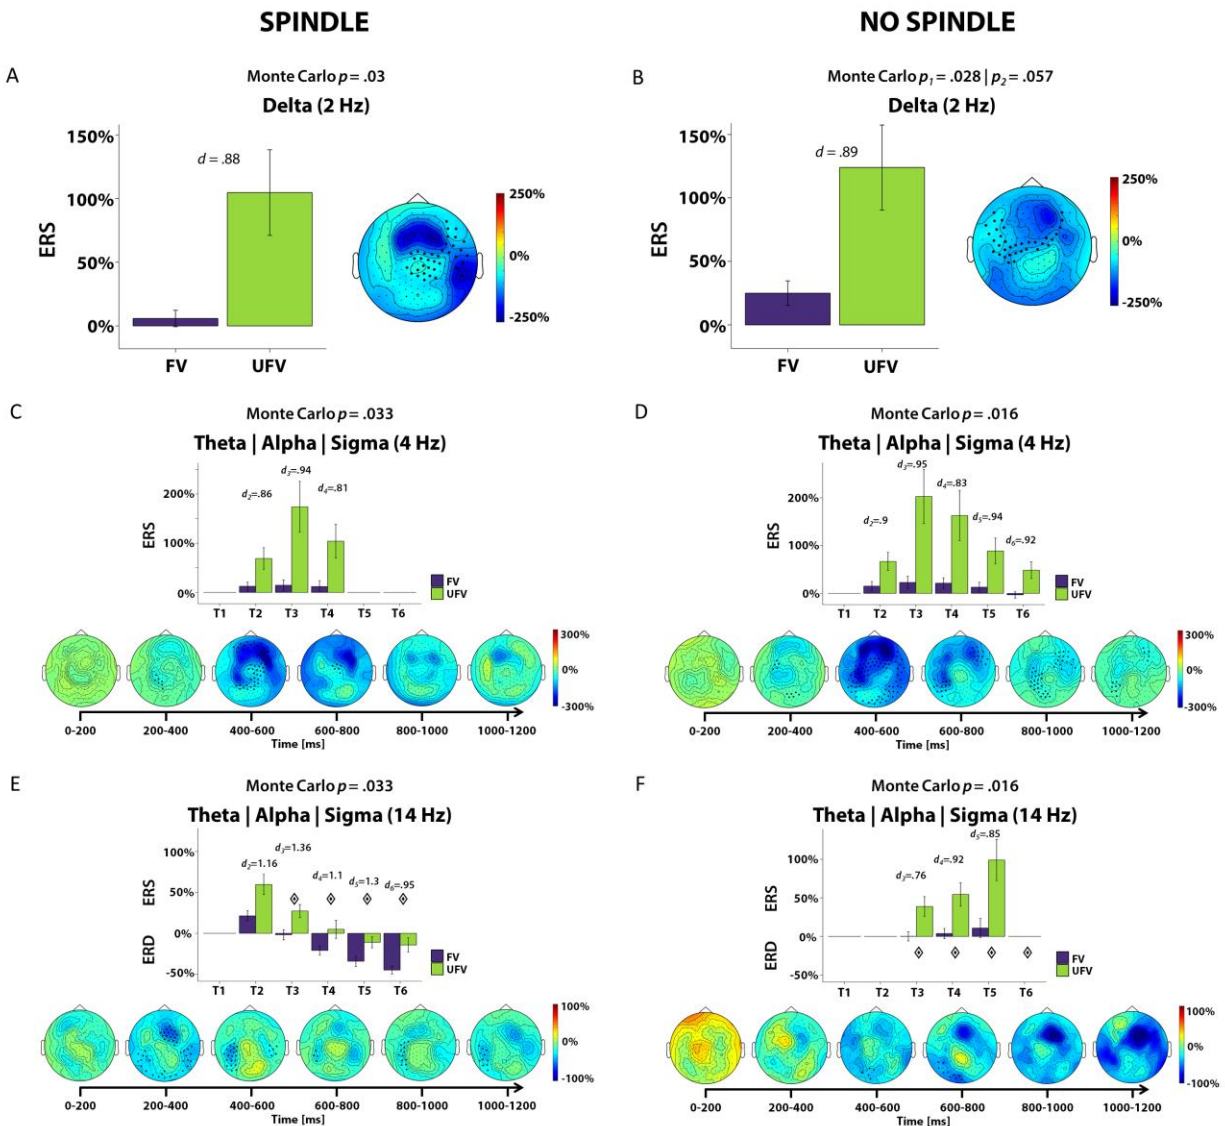

255

256 **Fig. 4: Event-related responses during N2/N3 sleep depending on the presence/absence of sleep spindles. (A,**

257 **B) Event-related responses in the delta (1-3Hz) range. Bar plots for the effect of *voice* (left) and corresponding scalp**

258 **plot of differences in ERS between FV and UFV (right). (C, D) Event-related responses in the theta/alpha/sigma (4-**

259 **15Hz) range at 4Hz and (E, F) responses at 14Hz. Bar plots for the effect of *voice* during the six time windows (top)**

260 **and corresponding scalp plots of differences in ERS/ERD between FV and UFV stimuli (bottom). Diamonds in**

261 **figures E and F indicate the time windows with significant differences between S+ and S- conditions at 14 Hz. Large**

14

262 black dots indicate the electrodes that are part of the clusters at 2Hz, 4Hz or 14Hz, respectively. Error bars indicate  
263  $\pm 1$  standard error of the mean and  $d$  is Cohen's  $d$  for the significant clusters. Please note that for illustration purposes we  
264 show the effects at representative frequencies (i.e. 2, 4 and 14 Hz) although significant clusters may have comprised  
265 a larger frequency range (see main text). FV = familiar voice, UFV = unfamiliar voice. Analyses and figures are  
266 based on data from  $n = 10$  participants.

267

### 268 *Stimulus Presentation along Slow Oscillation Positive vs. Negative Slope*

269 Irrespective of the slope of a SO during which a stimulus was presented, analyses yielded  
270 significant effects of *voice* (pos. slope:  $p < .001$ ,  $d = .70$  see Fig. 5A, neg. slope:  $p = .003$ ,  $d = .67$ , see  
271 Fig. 5B) in the delta range. Specifically, like in the other conditions UFV stimuli elicited stronger ERS  
272 than did FV stimuli between 1 and 3Hz in clusters spanning large parts of the scalp. There were no  
273 differences in delta ERS between positive and negative SO slope ( $p = .18$ ) and no further effects were  
274 evident in the delta range (pos. slope: *name*: no clusters; *voice*  $\times$  *name*:  $p > .1$ ; neg. slope: *name*:  $p = .18$ ;  
275 *voice*  $\times$  *name*:  $p > .16$ ). In the theta to sigma range (4-15Hz) analyses also revealed significant effects of  
276 *voice* in both conditions (pos. slope:  $p < .001$ , see Fig. 5C; neg. slope:  $p = .008$ , see Fig. 5D) with UFV  
277 stimuli eliciting stronger ERS than FV stimuli following about 200ms in a broad frequency range  
278 comparable to the effects in the other conditions regarding topography and time course (pos. slope: T1:  
279 9Hz; T2-6: 4-15Hz; neg. slope: T1: not part of the cluster; T2-6: 4-15Hz). There were no differences in  
280 the theta through sigma range between positive and negative SO slope ( $ps > .72$ ). The effects of *voice*  
281 were also confirmed by ERP analyses (pos. slope: see Suppl. Fig. 4B; neg. slope: see Suppl. Fig. 4C).  
282 There were no further effects in the theta through sigma range (pos. slope: *name*:  $ps > .27$  *name*  $\times$  *voice*:  
283  $ps > .31$ ; neg. slope: *name*:  $ps > .40$ ; *name*  $\times$  *voice*:  $ps > .48$ ).

## FAMILIARITY OF VOICE

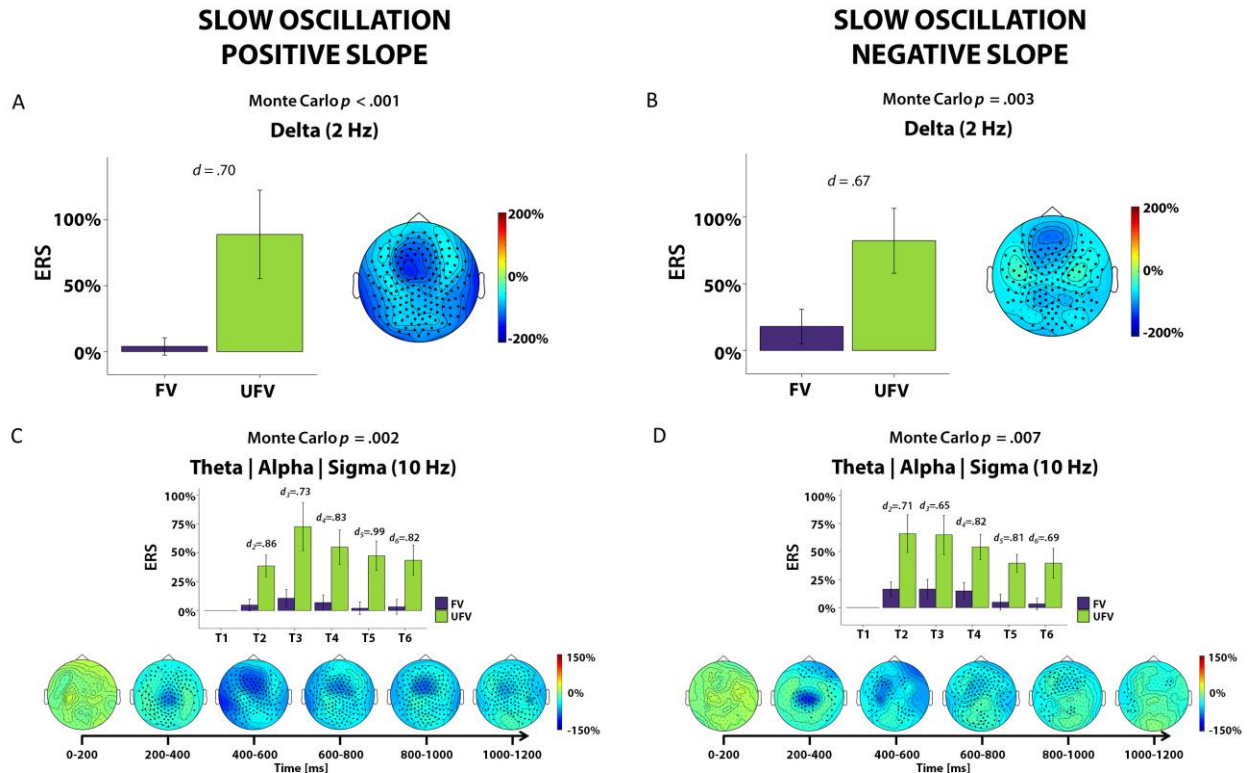

284

285

286

287

288

289

290

291

292

293

294

295

296

297

**Fig. 5: Event-related responses during N2/N3 sleep when a stimulus was presented along the positive vs. negative slope of the SO. (A, B) Event-related responses in the delta (1-3Hz) range. Bar plots for the effect of voice (left) and corresponding scalp plots of differences in ERS between FV and UFV (right). (C, D) Event-related responses in the theta/alpha/sigma (4-15Hz) range. Bar plots for the effect of voice during the six time windows (top) and corresponding scalp plots of differences in ERS/ERD between FV and UFV stimuli (bottom). Large black dots indicate the electrodes that are part of the significant clusters and  $d$  is Cohen's  $d$  for the significant clusters. Error bars indicate  $\pm 1$  standard error of the mean. Please note that for illustration purposes we show the effects at representative frequencies (i.e. 2 and 10 Hz) although significant clusters may have comprised a larger frequency range (see main text). FV = familiar voice, UFV = unfamiliar voice. Analyses and figures are based on data from  $n = 16$  participants.**



298 **Discussion**

299           In this study we show that especially processing of paralinguistic aspects of verbal stimuli such as  
300 the familiarity of a voice is even possible during fading and in the absence of consciousness during sleep.  
301 The findings add to existing evidence that the detection and evaluation of meaningful stimuli is still  
302 possible in these states (e.g. Perrin et al., 1999; Portas et al., 2000). Intriguingly, we do not only find that  
303 a differential response to familiar vs. unfamiliar voice (FV vs. UFV) stimuli persists during light NREM  
304 sleep stages N1 and N2 thus replicating previous results (cf. Blume et al., 2016; Perrin et al., 1999), but  
305 we extend this finding to deep N3 and intriguingly also REM sleep. Beyond this, we show that local brain  
306 states that have been suggested to alter sensory information processing during sleep, i.e. sleep spindles  
307 (Cote et al., 2000; Elton et al., 1997; Schabus et al., 2012) and slow oscillation down-states (Massimini et  
308 al., 2003; Schabus et al., 2012), do at least not uniformly, that is irrespective of stimulus characteristics,  
309 inhibit stimulus processing. Rather, their inhibitory function seems to be tuned to stimulus salience.

310           During wakefulness, SONs seemed to be salient when compared to UNs thus drawing more  
311 attentional resources. This was indicated by SONs eliciting stronger delta ERS than UNs across large  
312 areas of the scalp (Knyazev, 2007, 2012) and is well in line with the relatively larger P3 component  
313 evident in ERP analyses as well as results from earlier studies (e.g. Berlad & Pratt, 1995; Blume et al.,  
314 2016; Perrin et al., 1999). In an earlier study from our group, del Giudice et al. (2014) had also found  
315 stronger alpha ERD for SONs than for UNs, which we not could not replicate here. This may ultimately  
316 be due to methodological differences and the more conservative statistical analysis methods employed  
317 here. Somewhat surprisingly, no differences were evident between FV and UFV stimuli when participants  
318 were awake. However, we experience situations in which voices of varying degrees of familiarity are  
319 present along with unfamiliar voices every day and, in comparison to the SON, familiar voices do usually  
320 not draw attention automatically (cf. the "Cocktail Party Phenomenon"; Wood & Cowan, 1995).  
321 Probably, this were even maladaptive as the manifold familiar voices would constantly disturb orienting

322 and eventually allocation of attention. Thus, the lack of a differential response evoked by stimulus  
323 familiarity may well be considered adaptive.

324         During NREM sleep, that is from light N1 to deep N3 sleep, we consistently find that processing  
325 of FV vs. UFV stimuli gives rise to a differential response in the delta to sigma frequency range, an effect  
326 that is present in oscillatory analyses as well as ERPs. Most importantly, this provides support for the  
327 notion that processing of auditory stimuli and especially of paralinguistic stimulus aspects such as the  
328 familiarity of a voice is incessantly processed even in states where consciousness is absent. While this is  
329 well in line with earlier findings during light sleep stages N1 and N2 (e.g. Blume et al., 2016; Oswald et  
330 al., 1960; Portas et al., 2000), our results suggest that the same holds true even for deep N3 sleep. Thus,  
331 the findings also support the notion of a ‘sentinel processing mode’ of the brain during sleep, which we  
332 suggested in a previous publication (cf. Blume et al., 2016). Specifically, this mode describes the idea that  
333 (low-level) stimulus evaluation continues even when consciousness fades during sleep and the result of  
334 this evaluation may subsequently either trigger an inhibitory sleep-protecting response or awakening. In  
335 detail, we here find UFV stimuli to be associated with stronger ERS in the delta range than FV stimuli  
336 during all NREM sleep stages, an effect which was widespread across the scalp with the response being  
337 most pronounced above frontocentral areas. Adopting the interpretation of delta oscillations during  
338 wakefulness, the results suggest that UFV stimuli may become salient when consciousness fades  
339 (Knyazev, 2007, 2012). In particular, the presence of unfamiliar voices could challenge the impression of  
340 a safe environment that is necessary to ‘let go of consciousness’ and eventually fall and stay asleep,  
341 rendering them salient. However, an increase in delta ERS could also be related to a sleep-specific ERP,  
342 namely a K-complex-like response. K-complexes (KCs), whose peak frequency is in the delta range, have  
343 been suggested to serve cortical excitation and low-level information processing as well as the subsequent  
344 protection of sleep by neuronal silencing and they have been shown to be elicited by salient or high-  
345 intensity stimuli (Amzica & Steriade, 1997; Bastien & Campbell, 1992; Cash et al., 2009; Laurino et al.,  
346 2014). In line with the notion that KCs indicate ongoing cognitive processing, Vallat et al. (2017) have

347 recently reported a KC-like response during N2 sleep that was stronger for auditory stimuli that were  
348 followed by an arousal or awakening. The authors concluded that this reflects stronger reactivity of the  
349 brain to external stimuli, which in turn leads to stronger arousal. In accordance with this, ERP analyses of  
350 our data indicated that stimulus-induced differences in the delta range indeed reflected KC-like responses  
351 evoked by stimulus presentation with considerably larger amplitudes for UFV stimuli. In line with earlier  
352 ideas, we suggest that this ERP reflects increased (low-level) information processing of especially salient  
353 UFV stimuli (indexed by a larger positive wave), which is then followed by an inhibitory or sleep-  
354 protecting ‘down-state’ (indexed by a larger negative wave) that is likewise scaled to stimulus salience.  
355 Further support for this interpretation comes from analyses when stimulus presentation evoked an SO,  
356 with evoked SOs also seeming to be sensitive to stimulus salience. Also here, UFV stimuli were  
357 associated with stronger delta through sigma activity than FV stimuli and ERP analyses revealed that  
358 UFV stimuli were associated with a very slight positive-going wave, which was followed by a SO down-  
359 state that appeared much more pronounced for UFV stimuli (cf. Suppl. Fig. 4A). Besides the results  
360 obtained in the delta range, we also find that during all NREM sleep stages UFV stimuli are associated  
361 with stronger ERS in the theta through sigma range than FV stimuli, an effect which is most pronounced  
362 following about 200ms after stimulus onset. Most importantly, these findings are well in line with the  
363 delta results and they provide further convincing support for the notion that the brain is still able to  
364 process paralinguistic stimulus aspects even when consciousness fades and is absent. On a functional  
365 level, especially frequencies in the alpha and sigma range are thought to mirror an increase in arousal  
366 during sleep (cf. American Academy of Sleep Medicine & Iber, 2007). This suggests that UFV stimuli  
367 may be more arousing than FV stimuli during NREM sleep, an interpretation that, also given the observed  
368 KC-like response, is well in line with Vallat et al.’s results. As suggested above, the presence of  
369 unfamiliar voices may challenge the impression of an environment ‘safe to sleep’ and thus be arousing.  
370 Admittedly, our findings during N2 sleep partly contrast results earlier studies, where the brain also  
371 seemed to continue differentiating between UNs and SONs (e.g. Blume et al., 2016; Perrin et al., 1999).

372 The deviating findings could be due to methodological differences and/or participants sleeping during a  
373 whole night and not just an afternoon nap (cf. Blume et al., 2016) with differences in the homeostatic and  
374 circadian factors rendering it questionable whether a daytime nap can be considered a short night sleep  
375 equivalent.

376 In summary, results obtained during wakefulness and NREM sleep suggest that familiarity of a  
377 voice can be processed even during the fading of consciousness (N1) and in the full absence of  
378 (behavioural) consciousness (N2 and N3). For REM sleep, a paradoxical state characterised by (i) the  
379 return of ‘altered consciousness’, namely ‘dreaming’, (ii) enhanced brain metabolism (Maquet, 2000;  
380 Nofzinger, Mintun, Wiseman, Kupfer, & Moore, 1997) and (iii) an increase in higher frequency EEG  
381 power (Uchida, Maloney, & Feinberg, 1992), we also observed a relatively stronger increase in delta as  
382 well as alpha/sigma ERS elicited by UFV compared to FV stimuli, which may indicate continued  
383 processing and/or arousal of salient or potentially ‘dangerous’ UFV stimuli. This is especially interesting  
384 because REM sleep has been suggested to reflect a ‘closed loop’, that is a state in which the brain is rather  
385 occupied with intrinsic activity than processing of external stimuli (Andrillon, Poulsen, Hansen, Léger, &  
386 Kouider, 2016; Llinás & Paré, 1991; Wehrle et al., 2007) with our results challenging this notion. At the  
387 same time, while the oscillatory response pattern was generally similar to NREM sleep findings, REM  
388 responses were considerably weaker and markedly delayed by approx. 400ms. This underlines the idea  
389 that brain activity and processing of environmental stimuli during REM is qualitatively different although  
390 not generally precluded.

391 Beyond investigating stimulus processing across global brain states, i.e. wakefulness and different  
392 sleep stages, we were also interested in how stimulus presentation relates to ‘local oscillatory activity’,  
393 that is sleep spindles and slow oscillations (SOs), during N2 and N3 sleep. Generally, sleep spindles  
394 (Elton et al., 1997; Schabus et al., 2012) and the negative slope of slow oscillations (Schabus et al., 2012)  
395 have been suggested to inhibit processing of external stimuli. Here we find that this does not seem to be  
396 universally true but that brain responses are still tuned to stimulus salience suggesting that at least ‘low-

397 level' processing is not precluded. More specifically, we find that when a sleep spindle overlapped with  
398 stimulus presentation UFV stimuli still elicited responses in the delta through lower alpha (i.e. up to about  
399 9Hz) range that were similar to those obtained when not taking 'local oscillatory activity' into account.  
400 Intriguingly and unlike proposed earlier (Schabus et al., 2012; Steriade, 1991), this suggests that  
401 processing of external stimuli is not or at least not uniformly inhibited by the presence of a sleep spindle,  
402 i.e. spindles do not generally seem to act as a sensory filter at the thalamic level. Interestingly, this is well  
403 in line with recent findings in rodents where thalamocortical sensory relay was shown to persist even  
404 during sleep spindles (Sela, Vyazovskiy, Cirelli, Tononi, & Nir, 2016). Beyond this, above  $\approx 9$ Hz the  
405 response pattern when a spindle was present was markedly different from the general NREM (see Fig. 2)  
406 and, most importantly, the 'no spindle' (see Fig. 4F) patterns with FV stimuli eliciting stronger ERD than  
407 UFV stimuli in the  $\approx 11$ -15Hz spindle range (see Fig. 4C). We speculate that this could reflect a relatively  
408 stronger release of inhibition (reflected by 10-15Hz ERD) for seemingly less relevant FV stimuli by sleep  
409 spindles. Arguably, a selective mechanism that specifically filters information that is considered  
410 irrelevant, i.e. here FV stimuli, seems more adaptive than the uniform inhibition of all environmental  
411 stimuli. Following the idea of a 'sentinel processing mode' of the brain during sleep, spindles just as slow  
412 oscillations could thus reflect a sleep-protecting response that follows initial stimulus evaluation during  
413 N2 and N3. Besides sleep spindles, previous studies suggested that also the slope of a SO during stimulus  
414 presentation affects stimulus processing. In particular the negative slope has been found to be associated  
415 with decreased responses in studies using somatosensory stimuli and simple tones as compared to the  
416 positive SO slope. Surprisingly, in our study stimulus delivery during negative and positive slopes  
417 revealed similar responses with responses in both conditions being tuned to stimulus salience.  
418 Specifically, as during all other sleep stages UFV stimuli elicited stronger (delta to sigma) ERS than FV  
419 stimuli. These results were supported by ERP analyses indicating that UFV stimuli induced a more  
420 pronounced down-state that was preceded by an up-state. The findings thereby contrast earlier findings  
421 and suggest that also the negative slope of a SO does at least not uniformly inhibit information processing

422 and allows continued evaluation of stimulus characteristics. Likewise, the findings also suggest that  
423 during a positive SO slope the brain is not uniformly open to external stimulation.

424 In conclusion, this study shows that stimulus characteristics and especially the familiarity of a  
425 voice continue to be evaluated during all stages of NREM sleep and thus even in the complete absence of  
426 behavioural consciousness. Surprisingly, this is the case even during REM sleep with processing of  
427 external seeming to be slowed and decreased though. Our findings thereby provide support for the idea of  
428 a ‘sentinel processing mode’ of the brain during sleep, i.e. the continued processing of environmental  
429 stimuli even in the absence of consciousness that may then be followed by either an inhibitory sleep-  
430 protective response or awakening depending on the result of stimulus evaluation. Beyond this, it appears  
431 that even ‘local oscillatory activity’, i.e. sleep spindles and slow oscillations are sensitive to paralinguistic  
432 emotional stimulus characteristics. Furthermore, we provide novel evidence that even during spindles and  
433 the negative slope of a SO the brain reacts differentially to incoming information. In a wider context, our  
434 findings also suggest that using emotional stimuli such as familiar voices, or favourite sounds and music  
435 may be helpful in the medical and therapeutic context when patients are in states of reduced or altered  
436 awareness e.g. following severe brain injury.

437

## 438 **Methods and Materials**

### 439 *Participants*

440 We recruited 20 healthy individuals for the study. Three participants were excluded from the data  
441 analysis, one dropped out after the adaptation night and two had to be excluded due to technical problems  
442 during the acquisition. The remaining sample comprised 17 participants (three males) and had a median  
443 age of 22.6 years ( $SD = 2.3$  years). Prior to the study, participants gave written informed consent. Ethical  
444 consent had been obtained from the ethics committee of the University of Salzburg and the study was in  
445 accordance with the Declaration of Helsinki (World Medical Association (WMA), 1964). For more  
446 details on the study sample please see supplementary material.

447 ***Experimental procedure***

448 Participants were advised to keep a regular sleep/wake rhythm with eight hours time in bed (TIB) for  
449 at least four days prior to their first visit at our sleep laboratory, which was verified with wrist actigraphy  
450 (Cambridge Neurotechnology Actiwatch ©). Participants slept in the sleep laboratory of the University of  
451 Salzburg for two nights, one adaptation night and one experimental night. The adaptation and  
452 experimental nights were comparable except for no auditory stimulation during sleep taking place during  
453 the adaptation night. On both nights and the following mornings participants were tested during  
454 wakefulness resulting in four wakefulness recordings per participant. The wakefulness part comprised a  
455 passive listening as well as an active counting condition, during which participants listened to the stimuli  
456 presented via in-ear headphones at a volume of approximately 65 dB. For the passive condition  
457 participants were instructed to listen attentively to the stimuli while in the active condition they were to  
458 count the number of presentations of one specific name (i.e. the target). The passive condition always  
459 preceded the active one. In this publication, we only present the results from the passive listening  
460 condition, in which participants were presented with their own name (SON) as well as two unfamiliar  
461 names (UNs) as it is the only condition that can be analysed meaningfully across ‘global brain’ or  
462 vigilance stages (i.e. wakefulness, NREM and REM sleep). Moreover, each name was uttered by a  
463 familiar and by an unfamiliar voice. The stimulus set was specific for each participant and all names of  
464 one stimulus set were matched regarding the number of syllables and the occurrence in the general  
465 population. During the wakefulness recording, each stimulus was presented 40 times and the interstimulus  
466 interval (ISI) was 2000ms. Following the wakefulness recordings in the evenings, participants went to  
467 bed for eight hours of sleep. During the experimental night, stimulation was continued and the volume  
468 was adjusted individually so stimuli were clearly audible, but participants felt they could sleep despite the  
469 stimulation. The auditory stimulation protocol was akin to the passive condition of the wake part,  
470 although during the night, the stimulus onset asynchrony (SOA) was jittered between 2.8 and 7.8 s in  
471 500ms steps. SOA was jittered specifically in the sleep protocol as this was necessary to allow for an

472 investigation of stimulus processing in relation to various EEG sleep phenomena (i.e. sleep spindles and  
473 slow oscillations) independent of expectation effects. SOA was not jittered during wakefulness as this  
474 would have rendered the tasks lengthy and probably too fatiguing. During the night each stimulus was  
475 presented 690 times and had the same probability of occurrence as had each SOA. For more details on the  
476 experimental procedure please see the supplementary material.

#### 477 ***Electrophysiological data collection and reduction***

478 For EEG acquisition we used a 256 electrode GSN HydroCel Geodesic Sensor Net (Electrical  
479 Geodesics Inc., Eugene, Oregon, USA) and a Net Amps 400 amplifier.

#### 480 *Wakefulness data*

481 EEG data were processed using the Fieldtrip toolbox (Oostenveld, Fries, Maris, & Schoffelen, 2010)  
482 in Matlab (Mathworks, Natick, USA). First, the number of electrodes was reduced to 183 as the others  
483 contained a lot of ‘non-neural’ artefacts and high-pass filtered at 0.5Hz. Subsequently, eye movement  
484 artefacts were corrected using independent component analysis (ICA), data were segmented into 4s  
485 epochs (symmetrically to stimulus onset) and bad intervals were removed manually during visual data  
486 inspection. In the next step, the number of electrodes was further reduced to a final number of 173  
487 electrodes now excluding 10 more electrodes that had initially been kept for the identification of eye and  
488 muscular artefacts. Bad channels identified during visual data inspection were interpolated and data were  
489 re-referenced to average reference. Subsequently, we randomly selected the same number of trials for  
490 each stimulus to account for imbalances in the stimulus set (only one SON, but two UNs were presented).  
491 We then applied a Morlet wavelet transformation (cycles = 3, 1-16Hz, 1Hz frequency steps) to each of the  
492 segments, which was followed by a baseline correction (baseline interval: -600 to 0ms relative to stimulus  
493 onset) and averaging across trials.

#### 494 *Sleep data*

495 Sleep was scored semi-automatically by The Siesta Group© (Somnolyzer 24×7; cf. Anderer et al.,  
496 2005; Anderer et al., 2004) according to standard criteria (American Academy of Sleep Medicine & Iber,



497 2007). Spindles were detected automatically during NREM sleep stages N2 and N3 at central leads using  
498 the algorithm by Anderer et al. (2005). Slow oscillations (SOs) were also detected automatically on  
499 frontal electrodes using lab-internal Matlab routines (cf. Heib et al., 2013) based on the criteria by  
500 Massimini, Huber, Ferrarelli, Hill, and Tononi (2004). For more details on the detection of spindles and  
501 SOs please see supplementary material. Pre-processing for the sleep data was essentially the same as for  
502 the wakefulness data; but we refrained from an automatic eye movement correction in order to not  
503 remove REMs. Beyond investigating processing of different stimuli across ‘global brain states’, that is in  
504 each sleep stage, we also investigated stimulus processing with regard to ‘local brain states’, that is sleep  
505 spindles and SOs. To this end, we compared evoked oscillatory responses elicited by different stimuli  
506 when a spindle was present during stimulus onset (i.e. spindle offset min. 200ms after stimulus onset) or  
507 when there was a substantial overlap between a spindle and stimulus presentation (spindle onset 0-400ms  
508 after stimulus onset, i.e. spindle overlapping with at least half of the stimulus on average, cf. Suppl.Fig.1,  
509 A). Moreover, we were interested in stimulus-specific differences in the evoked slow oscillatory  
510 responses (“SO evoked”). More precisely, a SO was defined as “evoked” when the negative peak  
511 occurred between 300 and 600ms after stimulus onset (cf. Suppl.Fig.1, B1), that is the time range when  
512 the negative components of evoked K-complexes (i.e. N350 and N550) have been found to occur (Cote,  
513 De Lugt, Langley, & Campbell, 1999). Beyond this, we compared stimulus processing when stimulus  
514 onset was during the positive going slope of a SO (cf. Suppl.Fig.1, B2) to when stimulus onset coincided  
515 with the down-state (cf. Suppl.Fig.1, B3). For more details on data collection and analysis please refer to  
516 the supplementary material.

### 517 *Event-Related Potentials*

518 Although we focus on oscillatory activity in different frequency bands in the present manuscript,  
519 we provide results from event-related potential (ERP) analyses in the supplementary material (and Fig.1).

### 520 *Statistical Analyses*

521           Statistical analyses were performed using the cluster-based permutation approach to correct for  
522 multiple comparisons implemented in Fieldtrip that uses a Monte Carlo method for calculating  
523 significance probabilities (Maris & Oostenveld, 2007). Three tests were run for the main effects of *name*  
524 (SON vs. UNs), *voice* (FV vs. UVF) and the *name* × *voice* interaction with significant (or marginally  
525 significant) interaction clusters being followed by post-hoc tests. We ran a first set of tests for the delta  
526 range that included the dimensions electrode and frequency (1-3Hz in 1Hz frequency steps). In the delta  
527 range, values were averaged across time (0-1000ms after stimulus onset for the WAKE condition, 0-  
528 1200ms during SLEEP) as time resolution obtained with these low frequencies was considered  
529 insufficient for an analysis in the time dimension. A second test was then run for the theta, alpha and  
530 sigma ranges including the dimensions electrode, frequency (4-15Hz, 1Hz frequency steps) and time (0-  
531 1000ms, five time windows à 200ms each in the WAKE condition, 6 time windows from 0-1200ms  
532 during SLEEP). For the “spindle vs. no spindle” and “negative vs. positive SO slope” contrasts we  
533 calculated averaged values for FV/UVF for each condition, which we then compared. For all permutation  
534 tests the critical *p*-value for the *T*-statistic for dependent samples was set to 0.05 and 1000 randomisations  
535 were used. Spatial clusters were formed only if electrodes had a minimum of two neighbouring electrodes  
536 that were also significant. We report the Monte Carlo approximation for the estimate of *p*-values. Effects  
537 with (one-sided) Monte Carlo  $p < .05$  are denoted significant, effects with  $p < .1$  are denoted marginally  
538 significant. Critical *p*-values for post-hoc tests were adjusted for multiple comparisons using Bonferroni-  
539 corrected *p*-values. We report Cohen’s *d* ( $d = \text{mean difference in a significant cluster/standard deviation}$   
540 of the differences) as a measure of the effect size for all analyses. For more details on the statistical  
541 analysis please see the supplementary material.

542

### 543 ***Conflict of interest***

544           The authors declare no competing financial interests.

545

546 *Acknowledgements*

547           We thank Daniel Koerner and Adriana Michalak for their help with the data collection and pre-  
548 processing and Vincenzo Muto for his advice on the sleep staging. We also thank Wolfgang Klimesch for  
549 the valuable discussion about the results.

550

551 **References**

552

553 American Academy of Sleep Medicine, & Iber, C. (2007). *The AASM manual for the scoring of sleep and*  
554 *associated events: rules, terminology and technical specifications*: American Academy of Sleep  
555 Medicine.

556 Amzica, F., & Steriade, M. (1997). The K-complex: Its slow (<1-Hz) rhythmicity and relation to delta  
557 waves. *Neurology*, *49*(4), 952-959. doi:10.1212/wnl.49.4.952

558 Anderer, P., Gruber, G., Parapatics, S., Woertz, M., Miazhynskaia, T., Klösch, G., Saletu, B., Zeitlhofer,  
559 J., Barbanoj, M. J., & Danker-Hopfe, H. (2005). An E-health solution for automatic sleep  
560 classification according to Rechtschaffen and Kales: validation study of the Somnolyzer 24× 7  
561 utilizing the Siesta database. *Neuropsychobiology*, *51*(3), 115-133.

562 Anderer, P., Saletu, B., Saletu-Zyhlarz, G. M., Gruber, G., Parapatics, S., Miazhynskaia, T., Woertz, M.,  
563 Klösch, G., Zeitlhofer, J., & Dorffner, G. (2004). Recent advances in the electrophysiological  
564 evaluation of sleep. *Essentials and applications of EEG research in preclinical and clinical*  
565 *pharmacology*. Berlin: Unipublish Verlag für Studium & Praxis OHG, 307-339.

566 Andrillon, T., Poulsen, A. T., Hansen, L. K., Léger, D., & Kouider, S. (2016). Neural Markers of  
567 Responsiveness to the Environment in Human Sleep. *The Journal of Neuroscience*, *36*(24), 6583-  
568 6596. doi:10.1523/jneurosci.0902-16.2016

569 Bastien, C., & Campbell, K. (1992). The evoked K-complex: all-or-none phenomenon? *Sleep*, *15*(3), 236-  
570 245.

571 Bastuji, H., & García-Larrea, L. (1999). Evoked potentials as a tool for the investigation of human sleep.  
572 *Sleep Medicine Reviews*, *3*(1), 23-45. doi:[http://dx.doi.org/10.1016/S1087-0792\(99\)90012-6](http://dx.doi.org/10.1016/S1087-0792(99)90012-6)

573 Berlad, I., & Pratt, H. (1995). P300 in response to the subject's own name. *Electroencephalography and*  
574 *Clinical Neurophysiology*, *96*(5), 472-474.

- 575 Blume, C., del Giudice, R., Lechinger, J., Wislowska, M., Heib, D. P. J., Hoedlmoser, K., & Schabus, M.  
576 (2016). Preferential processing of emotionally and self-relevant stimuli persists in unconscious  
577 N2 sleep. *Brain and Language*. doi:<http://dx.doi.org/10.1016/j.bandl.2016.02.004>
- 578 Cash, S. S., Halgren, E., Dehghani, N., Rossetti, A. O., Thesen, T., Wang, C., Devinsky, O., Kuzniecky,  
579 R., Doyle, W., & Madsen, J. R. (2009). The human K-complex represents an isolated cortical  
580 down-state. *Science*, 324(5930), 1084-1087.
- 581 Cote, K. A., De Lugt, D. R., Langley, S. D., & Campbell, K. B. (1999). Scalp topography of the auditory  
582 evoked K-complex in stage 2 and slow wave sleep. *Journal of Sleep Research*, 8(4), 263-272.
- 583 Cote, K. A., Epps, T. M., & Campbell, K. B. (2000). The role of the spindle in human information  
584 processing of high-intensity stimuli during sleep. *Journal of Sleep Research*, 9(1), 19-26.  
585 doi:10.1046/j.1365-2869.2000.00188.x
- 586 Dang-Vu, T. T., Bonjean, M., Schabus, M., Boly, M., Darsaud, A., Desseilles, M., Degueldre, C.,  
587 Balteau, E., Phillips, C., & Luxen, A. (2011). Interplay between spontaneous and induced brain  
588 activity during human non-rapid eye movement sleep. *Proceedings of the National Academy of*  
589 *Sciences*, 108(37), 15438-15443.
- 590 De Gennaro, L., & Ferrara, M. (2003). Sleep spindles: an overview. *Sleep Medicine Reviews*, 7(5), 423-  
591 440.
- 592 del Giudice, R., Lechinger, J., Wislowska, M., Heib, D. P., Hoedlmoser, K., & Schabus, M. (2014).  
593 Oscillatory brain responses to own names uttered by unfamiliar and familiar voices. *Brain*  
594 *Research*, 1591, 63-73.
- 595 Dijk, D.-J., Duffy, J. F., & Czeisler, C. A. (1992). Circadian and sleep/wake dependent aspects of  
596 subjective alertness and cognitive performance. *Journal of Sleep Research*, 1(2), 112-117.  
597 doi:10.1111/j.1365-2869.1992.tb00021.x

- 598 Elton, M., Winter, O., Heslenfeld, D., Loewy, D., Campbell, K., & Kok, A. (1997). Event-related  
599 potentials to tones in the absence and presence of sleep spindles. *Journal of Sleep Research*, 6(2),  
600 78-83.
- 601 Heib, D. P. J., Hoedlmoser, K., Anderer, P., Zeitlhofer, J., Gruber, G., Klimesch, W., & Schabus, M.  
602 (2013). Slow Oscillation Amplitudes and Up-State Lengths Relate to Memory Improvement.  
603 *PLoS ONE*, 8(12), e82049. doi:10.1371/journal.pone.0082049
- 604 Klimesch, W. (1999). EEG alpha and theta oscillations reflect cognitive and memory performance: a  
605 review and analysis. *Brain Research Reviews*, 29(2-3), 169-195.
- 606 Klimesch, W., Doppelmayr, M., Russegger, H., Pachinger, T., & Schwaiger, J. (1998). Induced alpha  
607 band power changes in the human EEG and attention. *Neuroscience Letters*, 244(2), 73-76.  
608 doi:[http://dx.doi.org/10.1016/S0304-3940\(98\)00122-0](http://dx.doi.org/10.1016/S0304-3940(98)00122-0)
- 609 Klimesch, W., Schack, B., & Sauseng, P. (2005). The functional significance of theta and upper alpha  
610 oscillations. *Experimental Psychology*, 52(2), 99-108.
- 611 Knyazev, G. G. (2007). Motivation, emotion, and their inhibitory control mirrored in brain oscillations.  
612 *Neuroscience & Biobehavioral Reviews*, 31(3), 377-395.  
613 doi:<http://dx.doi.org/10.1016/j.neubiorev.2006.10.004>
- 614 Knyazev, G. G. (2012). EEG delta oscillations as a correlate of basic homeostatic and motivational  
615 processes. *Neuroscience & Biobehavioral Reviews*, 36(1), 677-695.  
616 doi:<http://dx.doi.org/10.1016/j.neubiorev.2011.10.002>
- 617 Laurino, M., Menicucci, D., Piarulli, A., Mastorci, F., Bedini, R., Allegrini, P., & Gemignani, A. (2014).  
618 Disentangling different functional roles of evoked K-complex components: Mapping the sleeping  
619 brain while quenching sensory processing. *NeuroImage*, 86, 433-445.  
620 doi:<http://dx.doi.org/10.1016/j.neuroimage.2013.10.030>
- 621 Llinás, R. R., & Paré, D. (1991). Of dreaming and wakefulness. *Neuroscience*, 44(3), 521-535.  
622 doi:[http://dx.doi.org/10.1016/0306-4522\(91\)90075-Y](http://dx.doi.org/10.1016/0306-4522(91)90075-Y)

- 623 Maquet, P. (2000). Functional neuroimaging of normal human sleep by positron emission tomography.  
624 *Journal of sleep research*, 9(3), 207-232.
- 625 Maris, E., & Oostenveld, R. (2007). Nonparametric statistical testing of EEG-and MEG-data. *Journal of*  
626 *Neuroscience Methods*, 164(1), 177-190.
- 627 Massimini, M., & Amzica, F. (2001). Extracellular calcium fluctuations and intracellular potentials in the  
628 cortex during the slow sleep oscillation. *Journal of Neurophysiology*, 85(3), 1346-1350.
- 629 Massimini, M., Huber, R., Ferrarelli, F., Hill, S., & Tononi, G. (2004). The sleep slow oscillation as a  
630 traveling wave. *The Journal of Neuroscience*, 24(31), 6862-6870.
- 631 Massimini, M., Rosanova, M., & Mariotti, M. (2003). EEG slow (~ 1 Hz) waves are associated with  
632 nonstationarity of thalamo-cortical sensory processing in the sleeping human. *Journal of*  
633 *Neurophysiology*, 89(3), 1205-1213.
- 634 Nofzinger, E. A., Mintun, M. A., Wiseman, M., Kupfer, D. J., & Moore, R. Y. (1997). Forebrain  
635 activation in REM sleep: an FDG PET study. *Brain research*, 770(1), 192-201.
- 636 Oostenveld, R., Fries, P., Maris, E., & Schoffelen, J.-M. (2010). FieldTrip: open source software for  
637 advanced analysis of MEG, EEG, and invasive electrophysiological data. *Computational*  
638 *Intelligence and Neuroscience*, 2011.
- 639 Oswald, I., Taylor, A. M., & Treisman, M. (1960). Discriminative responses to stimulation during human  
640 sleep. *Brain*.
- 641 Perrin, F., Garcia-Larrea, L., Mauguiere, F., & Bastuji, H. (1999). A differential brain response to the  
642 subject's own name persists during sleep. *Clinical Neurophysiology*, 110(12), 2153-2164.
- 643 Portas, C. M., Krakow, K., Allen, P., Josephs, O., Armony, J. L., & Frith, C. D. (2000). Auditory  
644 processing across the sleep-wake cycle: simultaneous EEG and fMRI monitoring in humans.  
645 *Neuron*, 28(3), 991-999.
- 646 Santhi, N., Lazar, A. S., McCabe, P. J., Lo, J. C., Groeger, J. A., & Dijk, D.-J. (2016). Sex differences in  
647 the circadian regulation of sleep and waking cognition in humans. *Proceedings of the National*

- 648 *Academy of Sciences of the United States of America*, 113(19), E2730-E2739.  
649 doi:10.1073/pnas.1521637113
- 650 Schabus, M., Dang-Vu, T. T., Heib, D. P. J., Boly, M., Desseilles, M., Vandewalle, G., Schmidt, C.,  
651 Albouy, G., Darsaud, A., & Gais, S. (2012). The fate of incoming stimuli during NREM sleep is  
652 determined by spindles and the phase of the slow oscillation. *Frontiers in Neurology*, 3.
- 653 Sela, Y., Vyazovskiy, V. V., Cirelli, C., Tononi, G., & Nir, Y. (2016). Responses in rat core auditory  
654 cortex are preserved during sleep spindle oscillations. *Sleep*, 39(5), 1069-1082.
- 655 Steriade, M. (1991). Normal and Altered States of Function. *Cerebral Cortex*, 9, 279e357.
- 656 Strauss, M., Sitt, J. D., King, J.-R., Elbaz, M., Azizi, L., Buiatti, M., Naccache, L., van Wassenhove, V.,  
657 & Dehaene, S. (2015). Disruption of hierarchical predictive coding during sleep. *Proceedings of*  
658 *the National Academy of Sciences*, 112(11), E1353-E1362.
- 659 Uchida, S., Maloney, T., & Feinberg, I. (1992). Beta (20-28 Hz) and delta (0.3-3 Hz) EEGs oscillate  
660 reciprocally across NREM and REM sleep. *Sleep*, 15(4), 352-358.
- 661 Vallat, R., Lajnef, T., Eichenlaub, J.-B., Berthomier, C., Jerbi, K., Morlet, D., & Ruby, P. M. (2017).  
662 Increased Evoked Potentials to Arousing Auditory Stimuli during Sleep: Implication for the  
663 Understanding of Dream Recall. *Frontiers in Human Neuroscience*, 11(132).  
664 doi:10.3389/fnhum.2017.00132
- 665 Wehrle, R., Kaufmann, C., Wetter, T. C., Holsboer, F., Auer, D. P., Pollmächer, T., & Czeisler, M. (2007).  
666 Functional microstates within human REM sleep: first evidence from fMRI of a thalamocortical  
667 network specific for phasic REM periods. *European Journal of Neuroscience*, 25(3), 863-871.
- 668 Wood, N., & Cowan, N. (1995). The cocktail party phenomenon revisited: how frequent are attention  
669 shifts to one's name in an irrelevant auditory channel? *Journal of Experimental Psychology:*  
670 *Learning, Memory, and Cognition*, 21(1), 255-260.
- 671 World Medical Association (WMA). (1964). Ethical Principles for Medical Research Involving Human  
672 Subjects. 10/13. Retrieved from <http://www.wma.net/en/30publications/10policies/b3/>



673 Wyatt, J. K., Cecco, A. R.-D., Czeisler, C. A., & Dijk, D.-J. (1999). Circadian temperature and melatonin  
674 rhythms, sleep, and neurobehavioral function in humans living on a 20-h day. *American Journal*  
675 *of Physiology - Regulatory, Integrative and Comparative Physiology*, 277(4), R1152-R1163.  
676
